# Supplementary material for: Metabolic Reprogramming of Endothelial-Related Pathways in COVID-19 Patients Treated with Hyperbaric Oxygen Therapy: A Randomized Clinical Trial
Source: Research Square preprint supplement (doi:10.21203/rs.3.rs-8643601/v1), 2026-01-22
Supplement: Supplementary file 1 [file a850490608bf314bda0b7664.docx]

**Metabolic Reprogramming of Endothelial-Related Pathways in COVID-19 Patients Treated with Hyperbaric Oxygen Therapy: A Randomized Clinical Trial**

Natalia Jermakow 1; Klaudia Brodaczewska 2; Jacek Kot 3; Krzysztof Urbanowicz 4; Jacek Turyn 4; Ryszard T. Smoleński 4; Arkadiusz Lubas 5; Krzysztof Kłos 6; Jacek Siewiera 1

1 Department of Hyperbaric Medicine, Military Institute of Medicine – National Research Institute, Szaserow 128, 04-141 Warsaw, Poland

2 The Laboratory of Molecular Oncology and Innovative Therapies, Military Institute of Medicine – National Research Institute, Szaserow 128, 04-141 Warsaw, Poland

3 National Centre for Hyperbaric Medicine, Institute of Maritime and Tropical Medicine, Medical University of Gdansk, Powstania Styczniowego 9B, 81-519 Gdynia, Poland

4 Department of Biochemistry Medical University of Gdańsk, Dębinki 1, 80-211, Gdańsk, Poland

5 Department of Internal Diseases Nephrology and Dialysis, Military Institute of Medicine – National Research Institute, Szaserow 128, 04-141 Warsaw, Poland

6 Department of Internal Medicine, Infectious Diseases and Allergology, Military Institute of Medicine – National Research Institute, Szaserow 128, 04-141 Warsaw, Poland

**Corresponding author**: Natalia Jermakow Department of Hyperbaric Medicine, Military Institute of Medicine – National Research Institute, Szaserow 128, 04-141 Warsaw, Poland

**E-mail**: [njermakow@gmail.com](mailto:njermakow@gmail.com)

**Supplementary Materials**

On Fig. S1, panels A–B display Spearman correlation matrices for the HBOT and control groups (log₁₊p-transformed values). Under HBOT, the correlation structure was denser and more cohesive, especially among metabolites of the arginine–urea cycle, phosphatidylserines, and creatine-related compounds. Several cross-pathway correlations emerged, connecting guanidino and phospholipid metabolites, suggesting an integrated metabolic adjustment involving endothelial nitric-oxide regulation and membrane remodeling. In contrast, the control group exhibited a sparser, locally restricted correlation structure, dominated by intra-class lipid associations.

Panels C–D show the corresponding correlation networks (r > 0.5, p < 0.05). The HBOT network displayed a higher number of significant edges and more interconnected clusters, indicating enhanced coordination between energy- and membrane-related metabolism. Notably, new inverse correlations between redox and methylation pathways imply compensatory remodeling rather than uniformly beneficial regulation.

Fig. S2 summarizes log₁₊p Pareto-scaled metabolite intensities assigned to pathways based on KEGG and HMDB annotations as well as known biochemical interrelationships:

- **Arginine & Urea Cycle / Guanidino Metabolism:** DL-Arginine, Homo-L-Arginine, Homocitrulline, Glycocyamine
- **Creatine & Derivatives:** Creatine Riboside
- **Choline / Glycerophospholipid Metabolism:** Alpha-GPC, Choline, Glycerophospho-N-Palmitoyl Ethanolamine, PE (0:0/18:3(6Z,9Z,12Z))
- **Phosphatidylserines / Membrane Turnover:** PS (O-18:0/0:0), PS (O-16:0/0:0)
- **Pterin & Folate Pathways:** Xanthopterin, 7,8-Dihydroxanthopterin
- **Purine Metabolism:** Uric Acid, Succinyladenosine
- **Tryptophan / Indole / Serotonin Pathways:** 4-Hydroxytryptophan, N-Methyltryptamine, HIAA, Tryptophan, DL-Tryptophan
- **Histidine / Imidazole Intermediates:** Imidazolepropionic Acid, Imidazole-4-Pyruvic Acid
- **Carnitine Shuttle & Fatty Acid Oxidation:** Acetyl-L-Carnitine, Octadecenoylcarnitine, Linoleyl Carnitine, Gamma-Linolenyl Carnitine, Cervonyl Carnitine
- **Amino Acids (Threonine / Methionine / Sulfur):** L-Threonine, 2-Aminobutanoic Acid, Acetyl-L-Methionine
- **Bile Acids / Steroid & Vitamin D Metabolism:** Cortisone, 1α-Hydroxy-22-Oxavitamin D₃ / 1α-Hydroxy-22-Oxacholecalciferol (or similar isomer)
- **Gut Microbiota Co-Metabolites:** Hippuric Acid

At baseline (panel A), HBOT and control groups did not differ significantly.

By mid-treatment (panel B) and particularly by Day 10 (panel C), HBOT induced significant shifts within the arginine/urea-cycle, creatine, and phospholipid pathways, consistent with the main dataset results.

These changes reflect coordinated late-phase remodeling, whereas tryptophan/indole, histidine/imidzazole, and bile-acid–related pathways remained largely unchanged, indicating that HBOT selectively affects endothelial and mitochondrial metabolism rather than global amino-acid turnover. Overall, these supplementary results confirm that HBOT promotes a tighter metabolic network and targeted pathway coordination while preserving heterogeneity and evidence of compensatory redox responses.
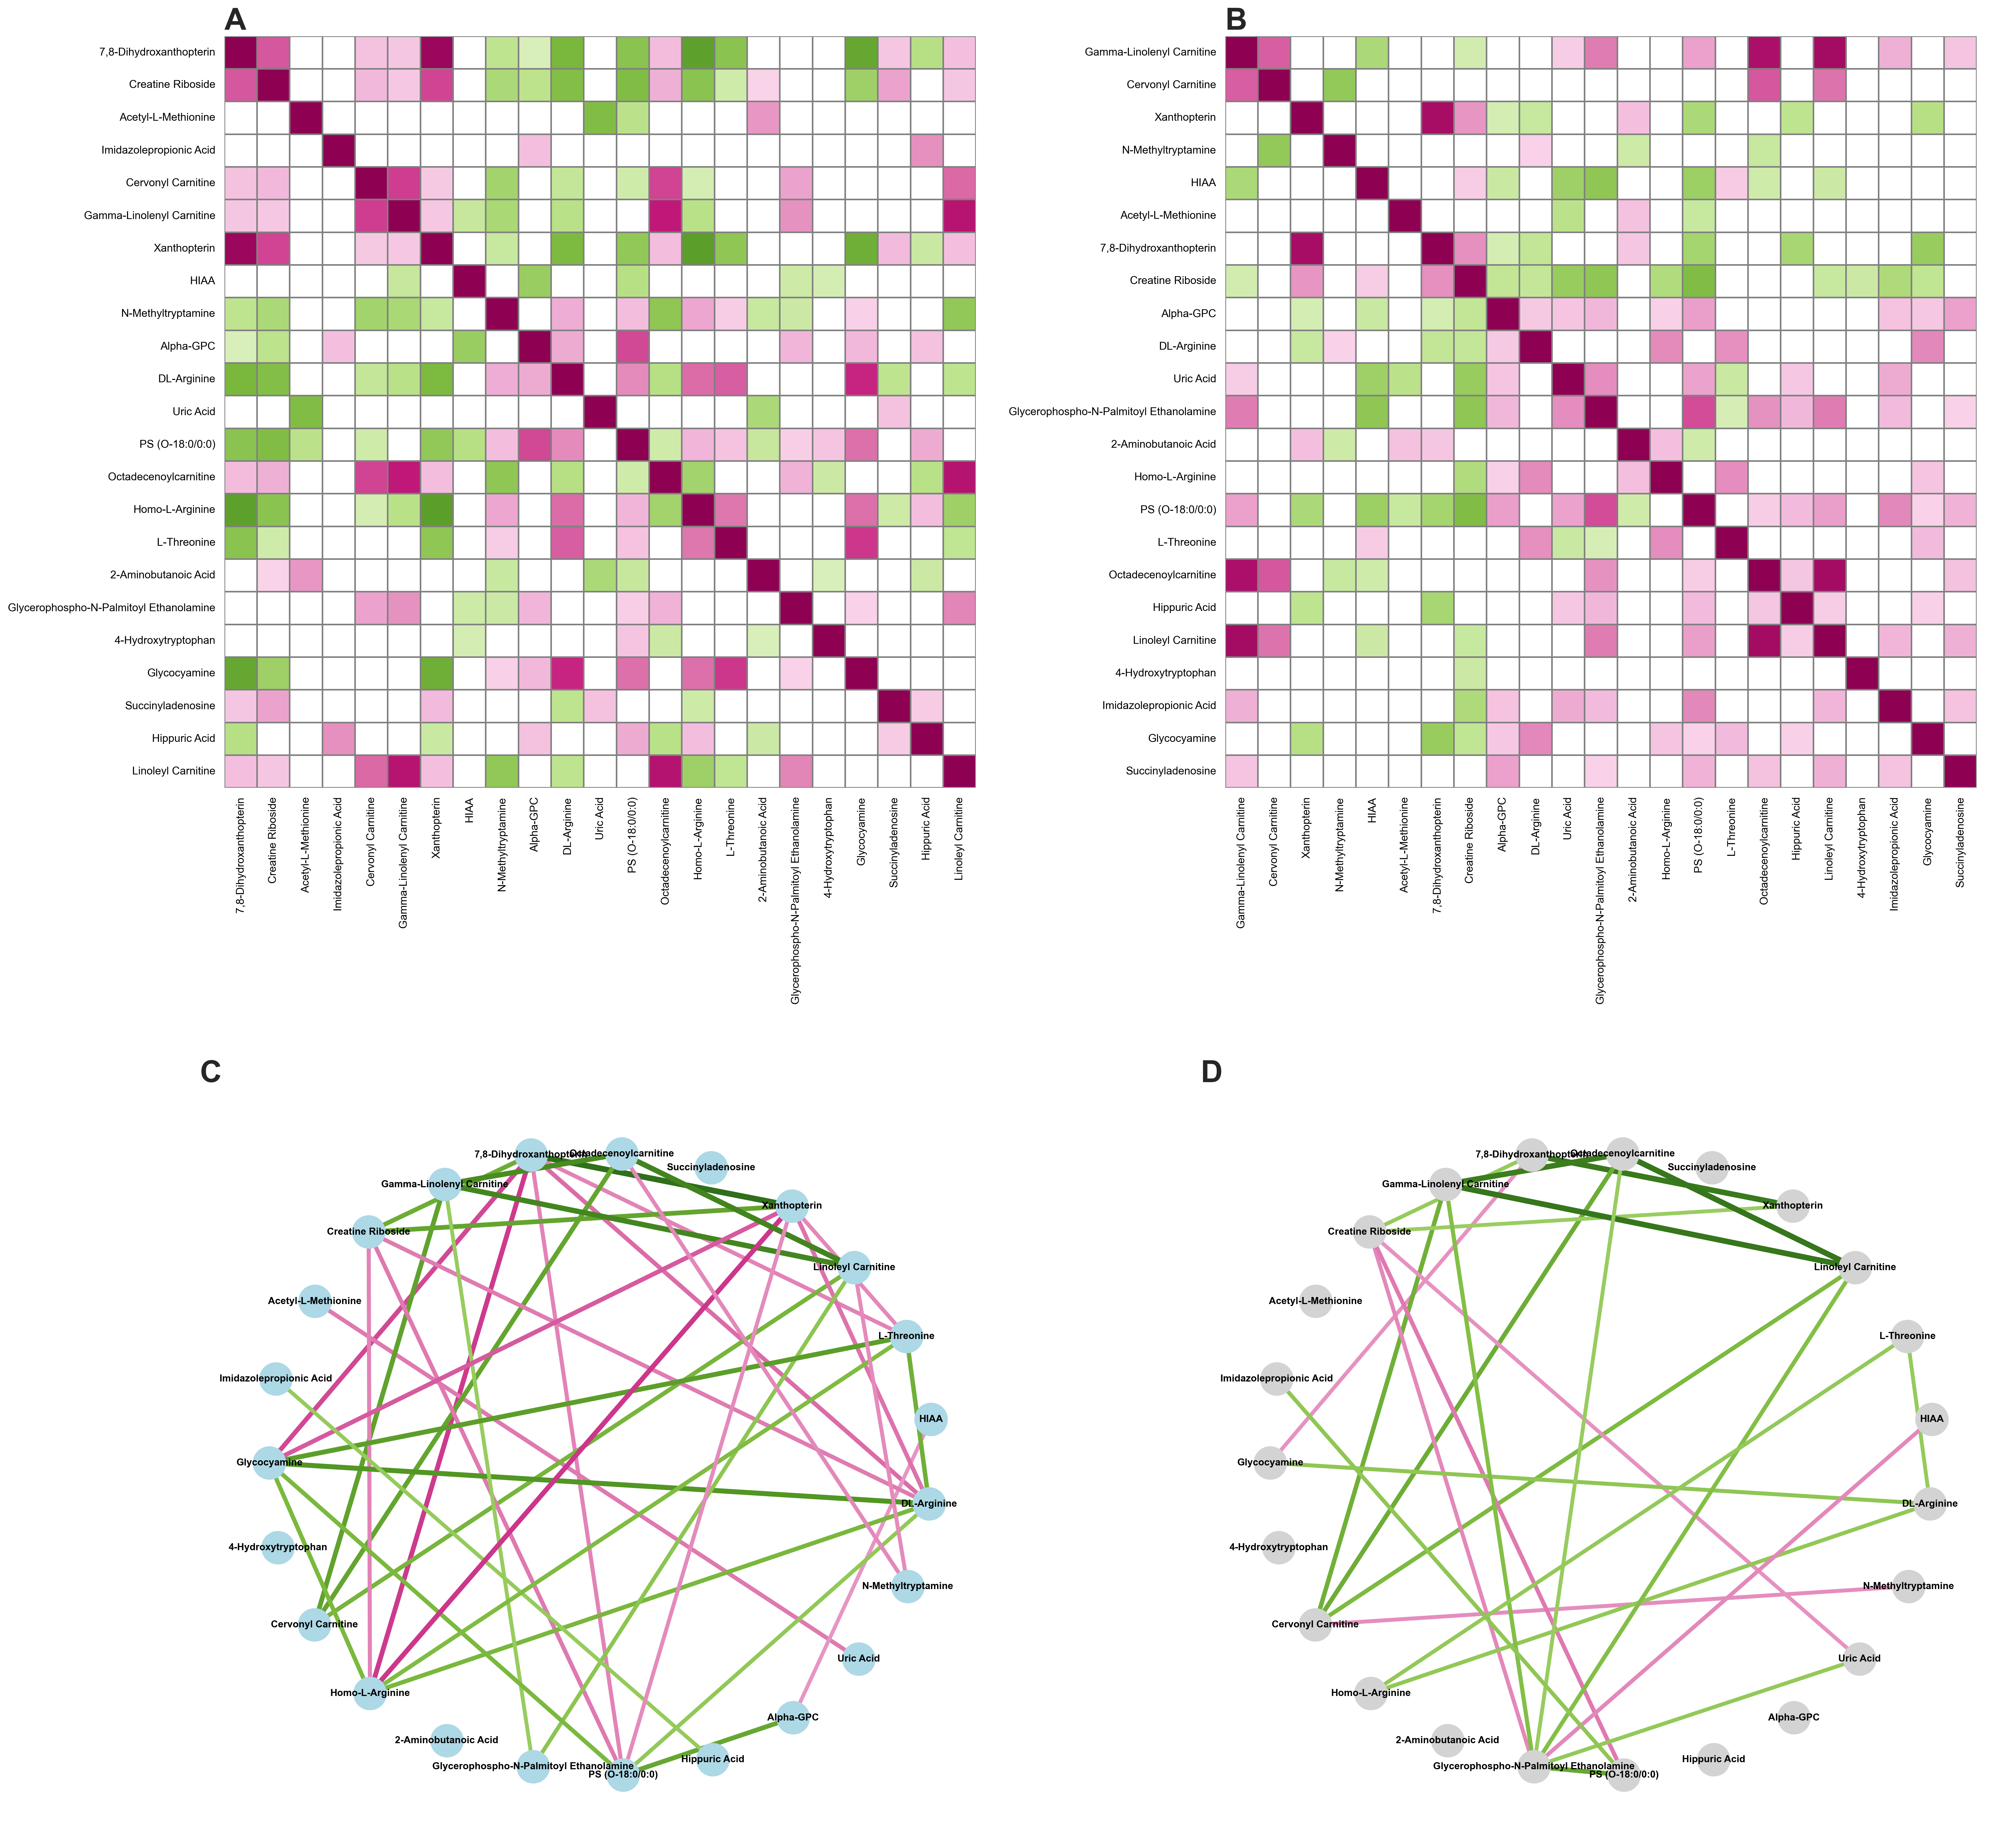
 **Fig. S1**. Pathway-level correlation structure and networks under HBOT and control conditions.(A–B) Spearman correlation matrices (log₁₊p values) for metabolites**.** White cells indicate non-significant correlations (p > 0.05).(C–D) Correlation networks showing only significant correlations (r> 0.5, p < 0.08).Edges represent significant correlations (green = positive, magenta = negative;HBOT demonstrates greater interconnectivity across arginine, creatine, and phospholipid metabolism compared to controls. **
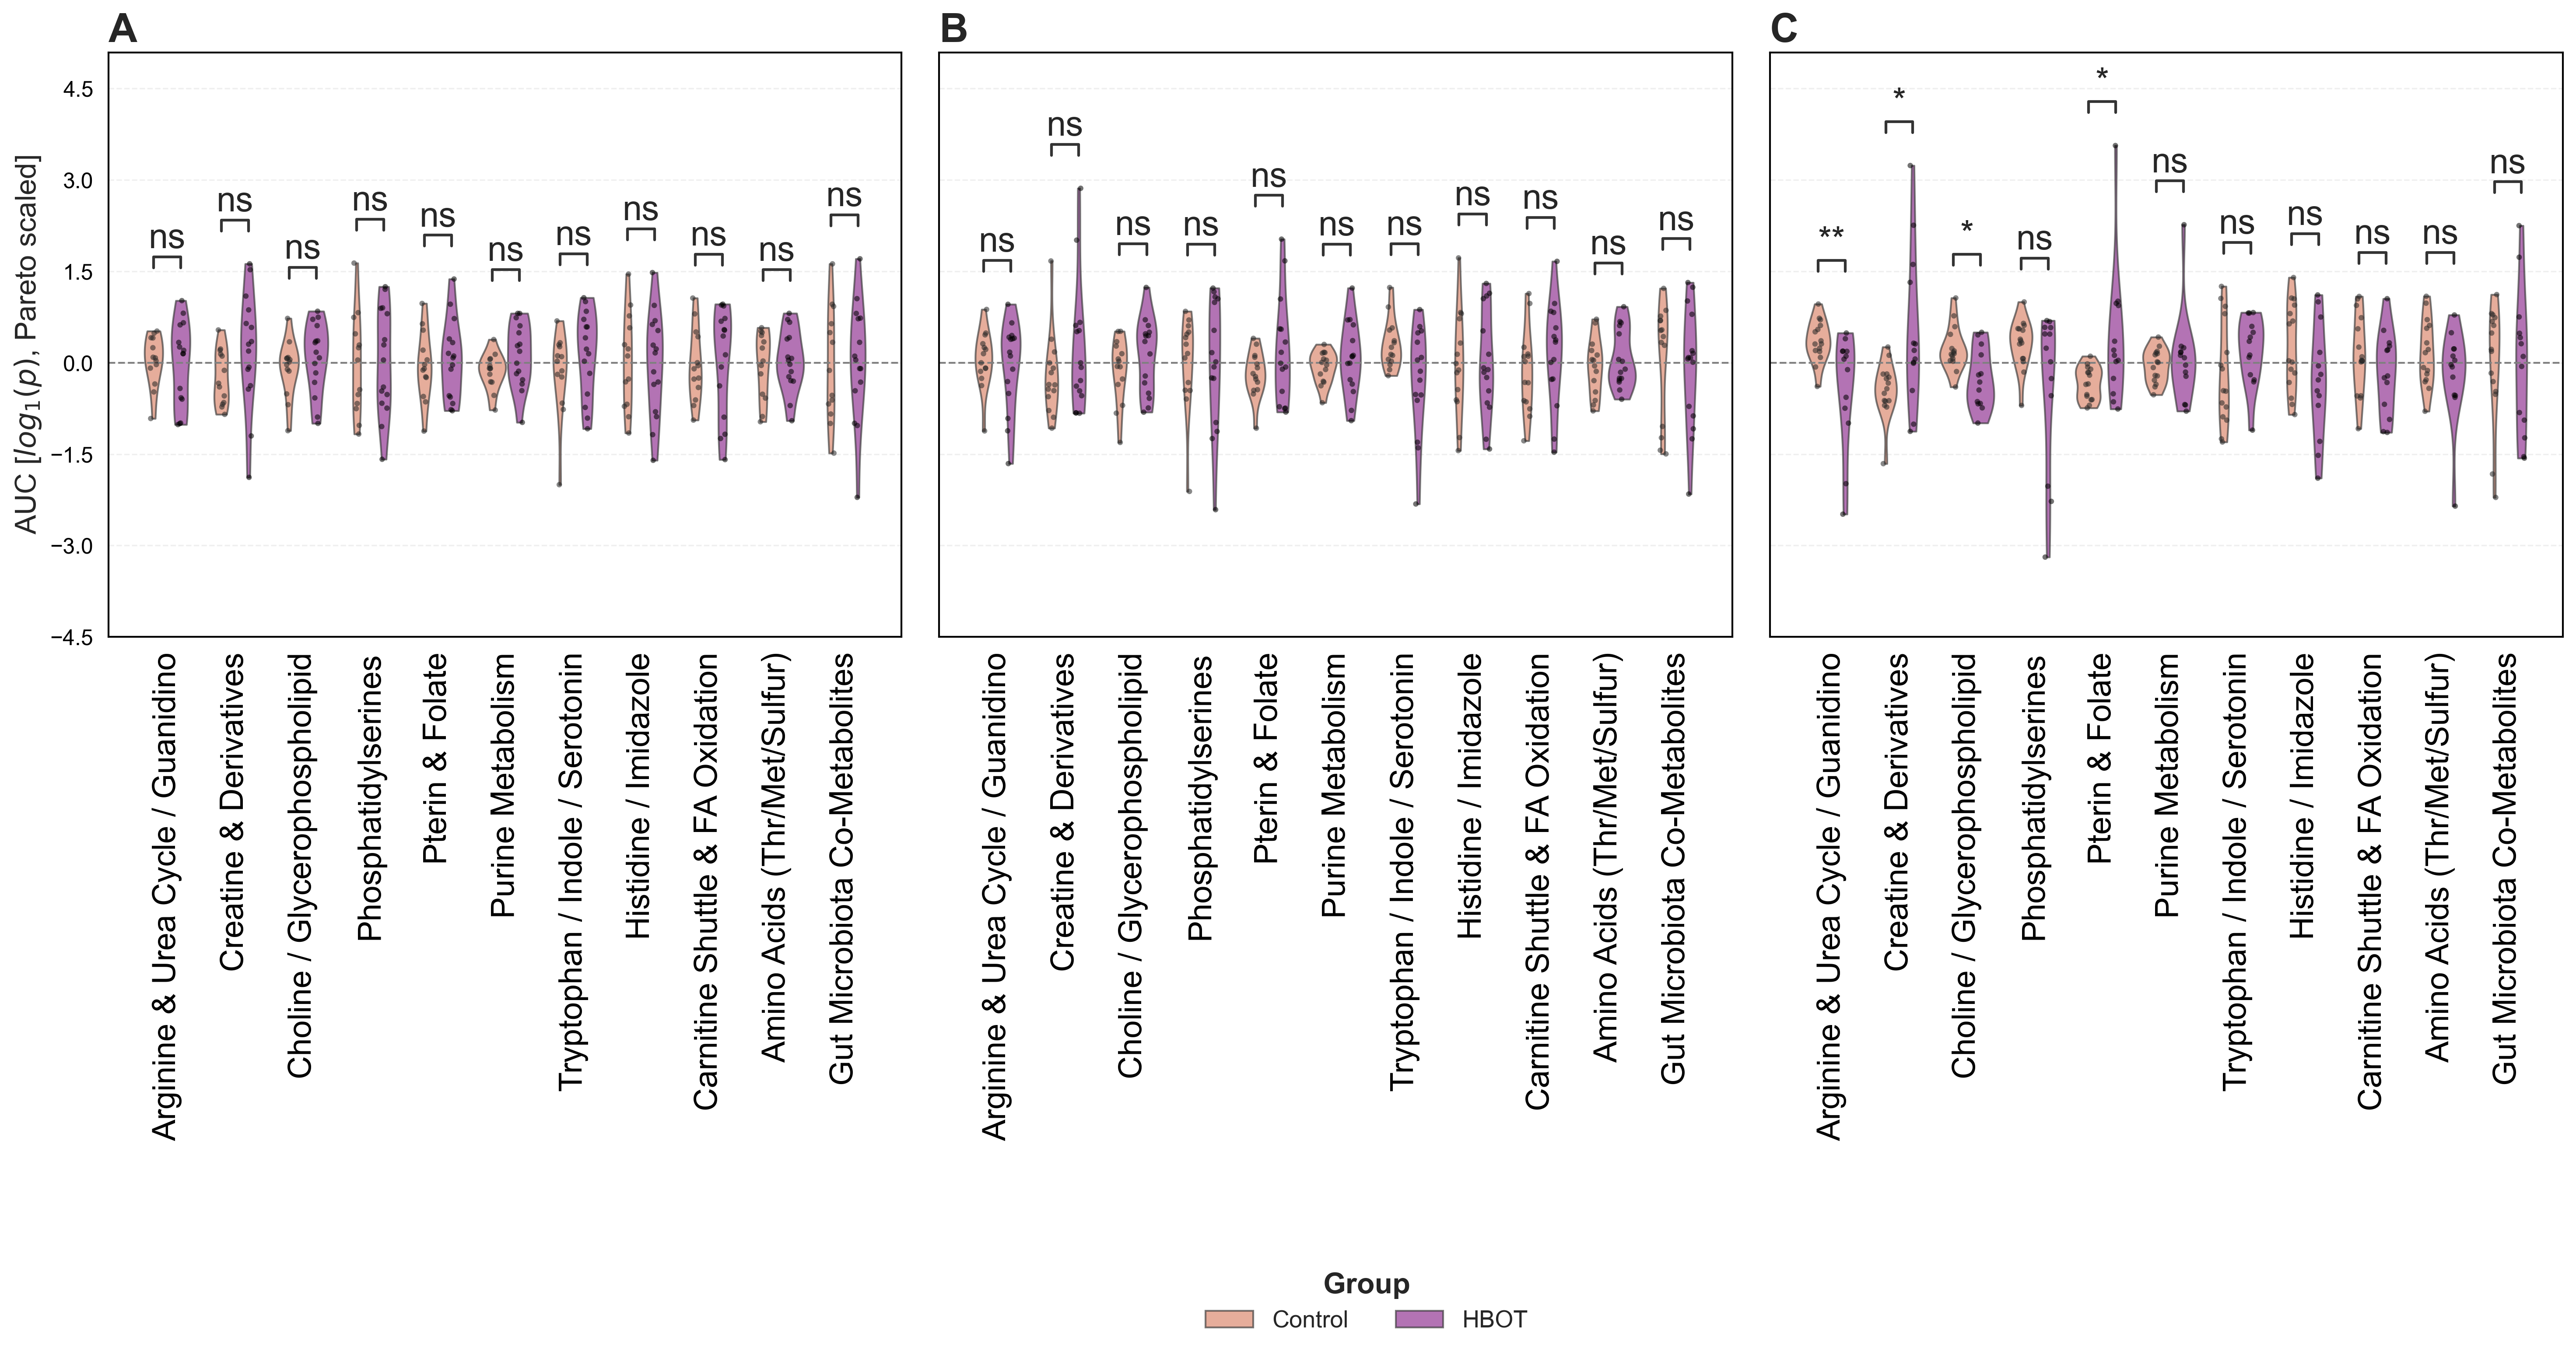
**

**Fig. S2.** Log₁₊p Pareto-scaled metabolite intensities in metabolic pathways at day 1 (A), 5 (B), 10 (C)
